# Supplementary material
Source: MDPI journal article supplement (https://www.mdpi.com/1999-4907/14/1/100)
Supplement: s1 [file s1]

**Table S1: Location of the forest ecosystem type and GPS coordinates**

| S.N. | Forest ecosystem type                                  | Name of Place                | District  | Latitude      | Longitude     |
|------|--------------------------------------------------------|------------------------------|-----------|---------------|---------------|
| 1    | Tropical mixed broad-leaved forest                     | Ilam-Jhapa Border            | Jhapa     | 26°47'28.82"N | 88°04'01.00"E |
| 2    | <i>Schima wallichii</i> - <i>Shorea robusta</i> forest | Jorkalas                     | Ilam      | 26°47'28.82"N | 88°04'01.00"E |
| 3    | Tropical mixed broad-leaved forest                     | Jorkalas                     | Ilam      | 26°47'28.56"N | 88°03'55.09"E |
| 4    | Tropical mixed broad-leaved forest                     | Domukha, Kankai              | Jhapa     | 26°41'06.24"N | 87°52'37.75"E |
| 5    | <i>Shorea robusta</i> forest                           | Shikharkateri, AndhaRajarani | Ilam      | 26°45'56.74"N | 87°41'47.69"E |
| 6    | Tropical mixed broad-leaved forest                     | Thakaldanda Letang 1         | Morang    | 26°45'10.00"N | 87°28'44.21"E |
| 7    | <i>Hymenodictyon excelsum</i> forest                   | Kerabari                     | Morang    | 26°45'03.00"N | 87°24'02.00"E |
| 8    | <i>Shorea robusta</i> forest                           | Latijhoda CF                 | Sunsari   | 26°42'20.55"N | 87°19'37.55"E |
| 9    | <i>Albizia</i> forest                                  | Chatara                      | Sunsari   | 26°50'41.48"N | 87°09'07.18"E |
| 10   | <i>Shorea robusta</i> forest                           | Sundarpur                    | Udayapur  | 26°44'50.50"N | 86°55'04.57"E |
| 11   | Bamboo thickets                                        | Baba Tal, Bandipur 2         | Siraha    | 26°53'48.55"N | 86°09'57.49"E |
| 12   | <i>Senegalia catechu</i> forest                        | Baba Tal, Bandipur 3         | Siraha    | 26°53'48.58"N | 86°09'55.55"E |
| 13   | <i>Shorea robusta</i> forest                           | Kalapani, Kamala             | Sindhuli  | 27°00'26.53"N | 86°09'12.10"E |
| 14   | <i>Shorea robusta</i> forest                           | Bhatighari CF Puspabanpur    | Danusha   | 26°57'22.40"N | 86°01'52.32"E |
| 15   | <i>Senegalia catechu</i> forest                        | Bhatighari CF Puspabanpur    | Danusha   | 26°56'46.28"N | 86°01'34.56"E |
| 16   | <i>Shorea robusta</i> forest                           | Upper Ranibas CF             | Sindhuli  | 27°04'16.02"N | 86°01'14.20"E |
| 17   | <i>Shorea robusta</i> forest                           | Bardibas                     | Mahottari | 27°02'13.56"N | 85°54'33.56"E |

|    |                                                        |                                   |             |               |               |
|----|--------------------------------------------------------|-----------------------------------|-------------|---------------|---------------|
| 18 | <i>Shorea robusta</i> forest                           | Baddada, Mardibas Mun 5           | Mahottari   | 27°04'26.50"N | 85°50'10.55"E |
| 19 | <i>Shorea robusta</i> forest                           | Tuteshwor Up                      | Sindhuli    | 27°04'10.19"N | 85°49'45.12"E |
| 20 | <i>Shorea robusta</i> forest                           | Maddovan, Marin                   | Sindhuli    | 27°11'23.58"N | 85°44'10.59"E |
| 21 | <i>Shorea robusta</i> forest                           | Fulbari Marin Gaupalika           | Sindhuli    | 27°13'45.22"N | 85°44'01.40"E |
| 22 | <i>Senegalia catechu</i> forest                        | Bagmati Mun 11, LopchanTol        | Sarlahi     | 27°07'23.21"N | 85°30'08.51"E |
| 23 | <i>Shorea robusta</i> forest                           | Bagdeu, Nijgad                    | Bara        | 27°11'15.53"N | 85°11'15.53"E |
| 24 | Tropical mixed broad-leaved forest                     | Gadhi Ht (Gwabari, Chuchhe Khola) | Makawanpur  | 27°24'04.55"N | 85°09'45.49"E |
| 25 | Tropical mixed broad-leaved forest                     | Shantitol, Gadhi (Rani CF)        | Makawanpur  | 27°24'29.23"N | 85°09'07.52"E |
| 26 | <i>Pinus roxburghii</i> forest                         | 3 No. Gate                        | Bara        | 27°19'36.17"N | 85°00'46.39"E |
| 27 | <i>Pinus roxburghii</i> - <i>Shorea robusta</i> forest | 3 No. bridge                      | Bara        | 27°19'22.51"N | 85°00'43.37"E |
| 28 | Tropical mixed broad-leaved forest                     | 3 No. Khola                       | Bara        | 27°19'37.51"N | 85°00'32.52"E |
| 29 | <i>Pinu sroxburghii</i> - <i>Shorea robusta</i> forest | 3 No Khola                        | Bara        | 27°19'37.51"N | 85°00'32.52"E |
| 30 | <i>Shorea robusta</i> forest                           | Jayasingh Manohari                | Makawanpur  | 27°27'37.49"N | 84°54'53.47"E |
| 31 | Tropical mixed broad-leaved forest                     | Kuwapani Shaktikhor               | Chitawan    | 27°44'01.00"N | 84°35'26.12"E |
| 32 | <i>Shorea robusta</i> forest                           | Pipaltar                          | Tanahun     | 27°46'10.25"N | 84°26'43.80"E |
| 33 | <i>Shorea robusta</i> forest                           | Maulakalika                       | Nawalparasi | 27°43'45.50"N | 84°24'33.60"E |
| 34 | <i>Shorea robusta</i> forest                           | Debchuli, Nilpokhari              | Nawalparasi | 27°42'38.00"N | 84°11'40.00"E |
| 35 | <i>Shorea robusta</i> forest                           | Daunne Forest                     | Nawalparasi | 27°33'07.74"N | 83°50'19.02"E |

|    |                                                           |                                      |             |               |               |
|----|-----------------------------------------------------------|--------------------------------------|-------------|---------------|---------------|
| 36 | <i>Shorea robusta</i> forest                              | Debdaha                              | Rupandehi   | 27°40'40.80"N | 83°36'37.49"E |
| 37 | <i>Shorea robusta</i> forest                              | Matribhumi CF Dovan                  | Palpa       | 27°45'11.00"N | 83°28'57.00"E |
| 38 | <i>Shorea robusta</i> forest                              | Bhut Khola Solighopte CF-Dovan       | Palpa       | 27°44'33.00"N | 83°28'01.00"E |
| 39 | Tropical mixed broad-leaved forest                        | Majhuwa, Kanchakhola                 | Palpa       | 27°45'19.42"N | 83°15'56.03"E |
| 40 | <i>Shorea robusta</i> forest                              | Pirapani, Shivaganga                 | Arghakhachi | 27°46'21.39"N | 83°03'35.90"E |
| 41 | Tropical mixed broad-leaved forest                        | Suraikhola                           | Dang        | 27°45'49.90"N | 82°50'20.00"E |
| 42 | <i>Dalbergia sissoo</i> - <i>Senegalia catechu</i> forest | Ajambari CF-Lamahi                   | Dang        | 27°50'33.00"N | 82°45'36.00"E |
| 43 | <i>Shorea robusta</i> forest                              | Rapti Bhalubang                      | Dang        | 27°52'20.00"N | 82°34'57.00"E |
| 44 | Tropical mixed broad-leaved forest                        | KoilabasThulichaur                   | Dang        | 27°43'04.33"N | 82°33'44.60"E |
| 45 | Tropical deciduous riverine forest                        | Chepang                              | Bardiya     | 28°21'18.20"N | 81°42'40.50"E |
| 46 | <i>Terminalia anogeissiana</i> forest                     | Pokharikada                          | Surkhet     | 28°45'16.50"N | 81°28'56.80"E |
| 47 | Tropical deciduous riverine forest                        | Padanaha                             | Bardiya     | 28°19'02.60"N | 81°18'28.50"E |
| 48 | <i>Syzygium cumini</i> forest                             | Karnali                              | Kailali     | 28°43'27.12"N | 81°15'36.74"E |
| 49 | <i>Syzygium cumini</i> forest                             | Masuriya                             | Kailali     | 28°44'15.36"N | 80°53'25.03"E |
| 50 | Tropical mixed broad-leaved forest                        | Mohaniyal                            | Kailali     | 28°48'21.42"N | 80°50'45.39"E |
| 51 | <i>Shorea robusta</i> forest                              | Syaule Inner, Chure VDC (Bannagadha) | Kailali     | 28°51'01.45"N | 80°38'10.12"E |
| 52 | <i>Pinus roxburghii</i> forest                            | Khanidanda, Chure VDC                | Kailali     | 28°57'10.70"N | 80°36'29.51"E |

|    |                                                           |               |            |               |               |
|----|-----------------------------------------------------------|---------------|------------|---------------|---------------|
| 53 | <i>Terminalia</i> forest                                  | Godabari Top  | Kailali    | 28°53'08.34"N | 80°34'55.21"E |
| 54 | <i>Dalbergia sissoo</i> - <i>Senegalia catechu</i> forest | Shreepur      | Kailali    | 28°48'40.90"N | 80°34'43.10"E |
| 55 | Tropical deciduous riverine forest                        | Godawari      | Kailali    | 28°51'50.70"N | 80°34'07.27"E |
| 56 | <i>Dalbergia sissoo</i> - <i>Senegalia catechu</i> forest | Godawari      | Kailali    | 28°52'02.75"N | 80°33'52.90"E |
| 57 | <i>Dalbergia sissoo</i> - <i>Senegalia catechu</i> forest | Malakheti     | Kailali    | 28°50'58.20"N | 80°33'10.70"E |
| 58 | <i>Dalbergia sissoo</i> - <i>Senegalia catechu</i> forest | Geta          | Kailali    | 28°47'22.50"N | 80°32'33.90"E |
| 59 | Tropical mixed broad-leaved forest                        | BedkotLibna   | Kanchanpur | 29°02'33.59"N | 80°19'33.13"E |
| 60 | <i>Shorea robusta</i> forest                              | DaijiBedkot 1 | Kanchanpur | 29°01'47.09"N | 80°19'23.59"E |
| 61 | Tropical mixed broad-leaved forest                        | DaijiBedkot 2 | Kanchanpur | 29°01'13.80"N | 80°18'53.10"E |
| 62 | <i>Terminalia</i> forest                                  | Salghad       | Kanchanpur | 29°01'13.02"N | 80°18'49.49"E |

**Table S2: Forest ecosystems in Chure and Terai**

| SN                         | Ecosystem identification no. | Type of ecosystem                                                         | Region |
|----------------------------|------------------------------|---------------------------------------------------------------------------|--------|
| <b>Ecosystems in Chure</b> |                              |                                                                           |        |
| 1                          | 6206                         | <i>Alnus nitida</i> riverine forest                                       | West   |
| 2                          | 7102                         | Tropical riverine forest ( <i>Albizia lebbek</i> , <i>Toona ciliata</i> ) | West   |
| 3                          | 7102                         | Mesophytic tropical forest in southern slope of Chure                     | West   |
| 4                          | 7106                         | Tropical deciduous forest ( <i>Senegalia</i> and <i>Dalbergia</i> )       | West   |
| 5                          | 7120                         | Hill Sal Forest                                                           | East   |
| 6                          | 7122                         | Dense <i>Shorea robusta</i> , <i>Lagerstroemia parviflora</i> Forest      | East   |
| 7                          | 7123                         | Dense <i>Terminalia tomentosa</i> and <i>T. bellirica</i> forest          | East   |

|                            |      |                                                               |      |
|----------------------------|------|---------------------------------------------------------------|------|
| 8                          | 7204 | Sal forest of Madesh                                          | West |
| <b>Ecosystems in Terai</b> |      |                                                               |      |
| 9                          | 7124 | Sal forest                                                    | East |
| 10                         | 7203 | <i>Bombax ceiba</i> , <i>Trewia nudiflora</i> riverine forest | West |
| 11                         | 7221 | Tropical mixed forest                                         | East |

Source: BPP [15].
